# Supplementary material for: RgIA4 Prevention of Acute Oxaliplatin-Induced Cold Allodynia Requires α9-Containing Nicotinic Acetylcholine Receptors and CD3+ T-Cells
Source: MDPI journal article supplement (doi:10.3390/cells11223561), 2022-11-11
Supplement: s1 [file s1]

Article

# RgIA4 Prevention of Acute Oxaliplatin-Induced Cold Allodynia Requires $\alpha 9$ -Containing Nicotinic Acetylcholine Receptors and CD3<sup>+</sup> T-Cells

Peter N. Huynh <sup>1,\*</sup>, Sean B. Christensen <sup>1</sup> and J. Michael McIntosh <sup>1,2,3</sup>

<sup>1</sup> School of Biological Sciences, University of Utah, Salt Lake City, UT 84112, USA

<sup>2</sup> George E. Wahlen Veterans Affairs Medical Center, Salt Lake City, UT 84112, USA

<sup>3</sup> Department of Psychiatry, University of Utah, Salt Lake City, UT 84112, USA

\* Correspondence: peter.huynh@utah.edu

## Supplemental Information

**Table S1:** Commercial antibodies used in flow cytometry analysis and CD3<sup>+</sup> cell depletion accompanied with test concentrations.

| Flow Cytometry Antibodies    |                |          |                           |                  |            |                |              |             |
|------------------------------|----------------|----------|---------------------------|------------------|------------|----------------|--------------|-------------|
| Target                       | Fluorophore    | Clone    | $\mu\text{g}/\text{test}$ | Host             | Reactivity | Isotype        | Manufacturer | Catalog No. |
| Viability                    | FVS575V        | N/A      | 0.59                      | N/A              | N/A        | N/A            | BD Horizon   | 565694      |
| CD45                         | AlexaFluor 594 | 30-F11   | 0.25                      | Rat              | Mouse      | IgG2c          | Bio-Rad      | 128011      |
| CD11b                        | PE/Cyanine7    | M1/70    | 0.625                     | Rat              | Mouse      | IgG2b          | Invitrogen   | 25-01122-81 |
| CD3                          | APC            | KT3      | 10                        | Rat              | Mouse      | IgG2a          | Bio-Rad      | MCA500APC   |
| CD4                          | Pacific Blue   | RM4-5    | 10                        | Rat              | Mouse      | IgG2a          | Bio-Rad      | MCA2691PB   |
| CD8                          | PE-Cy5.5       | 53.6.7   | 0.625                     | Rat              | Mouse      | IgG2a $\kappa$ | ThermoFisher | 35-0081-80  |
| CD25                         | PE             | PC61.5.3 | 5                         | Rat              | Mouse      | IgG1           | ThermoFisher | MA5-17817   |
| In vivo depletion antibodies |                |          |                           |                  |            |                |              |             |
| Target                       | Fluorophore    | Clone    | mg/kg                     | Host             | Reactivity | Isotype        | Manufacturer | Catalog No. |
| CD3 $\epsilon$               | -              | 145-2C11 | 1000                      | Armenian Hamster | Mouse      | IgG1           | BioXCell     | BE0001-1    |
